# Supplementary material for: Photocatalytic activities of Cu3xLa1–xTa7O19 solid solutions for H2 evolution under visible light irradiation
Source: Royal Society of Chemistry journal article supplement (doi:10.1039/c3cy00557g), 2013-01-01
Supplement: c3cy00557g.pdf [file c3cy00557g.pdf]

Supplementary information for:

## Photocatalytic activities of $\text{Cu}_{3x}\text{La}_{1-x}\text{Ta}_7\text{O}_{19}$ solid solutions for $\text{H}_2$ evolution under visible light irradiation

Hideki Kato,<sup>a\*</sup> Arisa Takeda,<sup>a</sup> Makoto Kobayashi,<sup>a</sup> Michikazu Hara<sup>b</sup> and Masato Kakihana<sup>a</sup>

<sup>a</sup>Institute of Multidisciplinary Research for Advanced Materials, Tohoku University, 2-1-1  
Katahira, Aoba-ku, Sendai 980-8577, Japan

<sup>b</sup>Materials and Structures Laboratory, Tokyo Institute of Technology, 4259 Nagatsuta-cho,  
Midori-ku, Yokohama 226-8503, Japan

Corresponding author:

Associate Professor Hideki KATO

Institute of Multidisciplinary Research for Advanced Materials, Tohoku University,

2-1-1 Katahira, Aoba-ku, Sendai 980-8577, Japan

E-mail: [hkato@tagen.tohoku.ac.jp](mailto:hkato@tagen.tohoku.ac.jp)

Tel: +81-22-217-5650

Fax: +81-22-217-5651

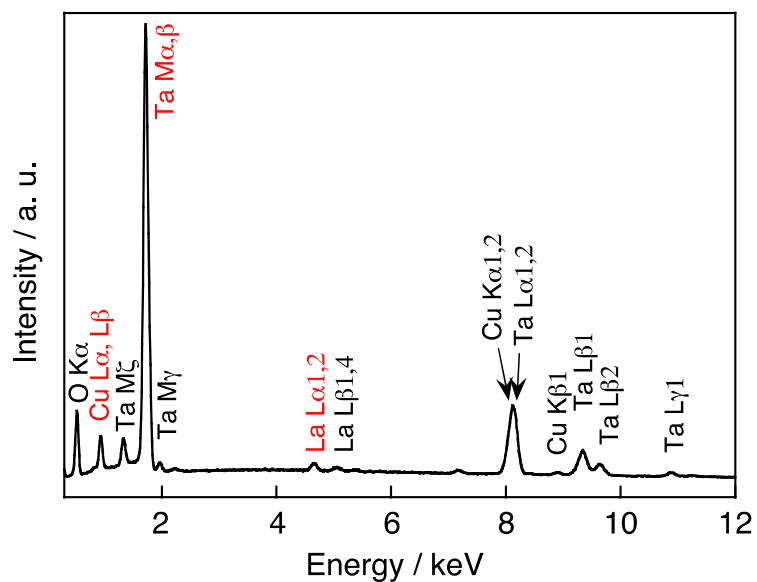

**Fig. S1** Energy dispersive spectrum for  $\text{Cu}_{1.2}\text{La}_{0.6}\text{Ta}_7\text{O}_{19}$  ( $x = 0.4$ ). The  $K\alpha$  of the strongest line for Cu overlapped with the Ta  $L\alpha$  line. Therefore, lines of Ta  $M\alpha,\beta$ , Cu  $L\alpha$  and La  $L\alpha$  were chosen as regions of interest to take reliable element mapping images.

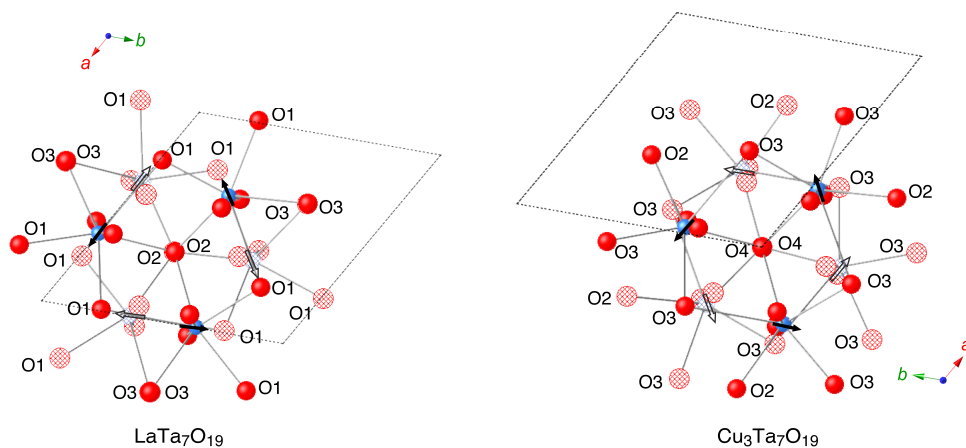

**Fig. S2** Dipole moments at TaO<sub>7</sub> pentagonal bipyramids in LaTa<sub>7</sub>O<sub>19</sub> and Cu<sub>3</sub>Ta<sub>7</sub>O<sub>19</sub>. Red and blue balls represent O and Ta atoms, respectively. Filled balls: atoms in the TaO<sub>7</sub>-layer I, hatched balls: atoms in the TaO<sub>7</sub>-layer II. Black and white arrows represent dipole moments at TaO<sub>7</sub> polyhedra in the TaO<sub>7</sub>-layers I and II, respectively. The arrows are drawn with the same length because the difference in the strength of dipole moments between LaTa<sub>7</sub>O<sub>19</sub> and Cu<sub>3</sub>Ta<sub>7</sub>O<sub>19</sub> is only 2%.

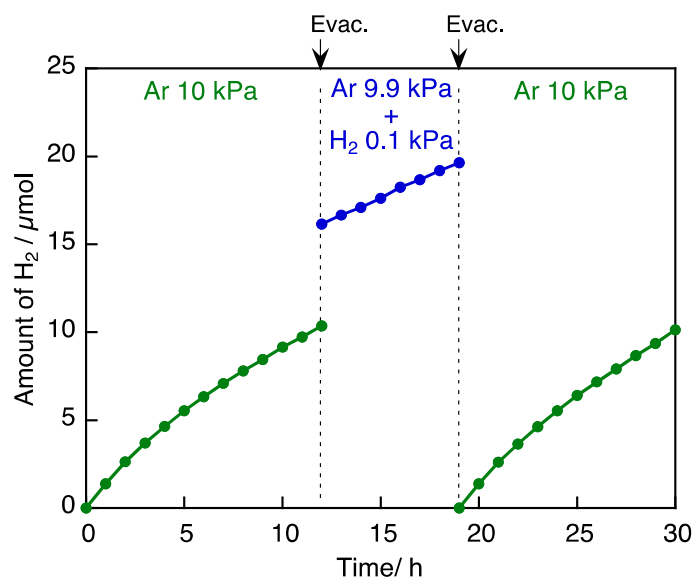

**Fig. S3** Influence of the reaction atmosphere on photocatalytic activity of Pt(0.5 wt%)-loaded  $\text{Cu}_{1.2}\text{La}_{0.6}\text{Ta}_7\text{O}_{19}$  for  $\text{H}_2$  evolution. Catalyst: 0.3 g; reactant solution: 10 vol% methanol, pH = 4; light source: 300-W Xe lamp ( $\lambda > 420$  nm). The second run was conducted with introduction of 0.1 kPa of  $\text{H}_2$  and 9.9 kPa of Ar into the reaction system following the evacuation of gaseous products for the first run. The third run was conducted under 10 kPa of Ar after the evacuation of gaseous products for the second run.
